# Supplementary material
Source: PubMed Central journal article supplement (PMC5008044)
Supplement: nnr-65-371-s001.pdf [file nnr-65-371-s001.pdf]

Mplus VERSION 7  
MUTHEN & MUTHEN  
02/04/2016 10:04 AM

INPUT INSTRUCTIONS

TITLE: Mplus CFA  
DATA: FILE IS C:\Users\hz\Desktop\mplus\F123 CFA.txt;  
VARIABLE: NAMES ARE I1-I83;  
MODEL: f1 BY I1-I25;  
f2 BY I26-I53;  
f3 BY I54-I83;  
  
output: standardized ;

INPUT READING TERMINATED NORMALLY

Mplus CFA

SUMMARY OF ANALYSIS

|                                       |      |
|---------------------------------------|------|
| Number of groups                      | 1    |
| Number of observations                | 1156 |
| Number of dependent variables         | 83   |
| Number of independent variables       | 0    |
| Number of continuous latent variables | 3    |

Observed dependent variables

Continuous

|     |     |     |     |     |     |
|-----|-----|-----|-----|-----|-----|
| I1  | I2  | I3  | I4  | I5  | I6  |
| I7  | I8  | I9  | I10 | I11 | I12 |
| I13 | I14 | I15 | I16 | I17 | I18 |
| I19 | I20 | I21 | I22 | I23 | I24 |
| I25 | I26 | I27 | I28 | I29 | I30 |
| I31 | I32 | I33 | I34 | I35 | I36 |
| I37 | I38 | I39 | I40 | I41 | I42 |
| I43 | I44 | I45 | I46 | I47 | I48 |
| I49 | I50 | I51 | I52 | I53 | I54 |
| I55 | I56 | I57 | I58 | I59 | I60 |
| I61 | I62 | I63 | I64 | I65 | I66 |
| I67 | I68 | I69 | I70 | I71 | I72 |
| I73 | I74 | I75 | I76 | I77 | I78 |
| I79 | I80 | I81 | I82 | I83 |     |

Continuous latent variables

|    |    |    |
|----|----|----|
| F1 | F2 | F3 |
|----|----|----|

|                                               |           |
|-----------------------------------------------|-----------|
| Estimator                                     | ML        |
| Information matrix                            | OBSERVED  |
| Maximum number of iterations                  | 1000      |
| Convergence criterion                         | 0.500D-04 |
| Maximum number of steepest descent iterations | 20        |

Input data file(s)

C:\Users\hz\Desktop\Mplus data\F123 CFA.txt

---

Input data format FREE

THE MODEL ESTIMATION TERMINATED NORMALLY

MODEL FIT INFORMATION

Number of Free Parameters 252

Loglikelihood

H0 Value -115477.982  
 H1 Value -111900.113

Information Criteria

Akaike (AIC) 231313.964  
 Bayesian (BIC) 232224.789  
 Sample-Size Adjusted BIC 231656.216  
 (n\* = (n + 2) / 24)

Chi-Square Test of Model Fit

Value 7155.738  
 Degrees of Freedom 1473  
 P-Value 0.0000

RMSEA (Root Mean Square Error Of Approximation)

Estimate 0.057  
 90 Percent C.I. 0.055 0.058  
 Probability RMSEA <= .05 0.000

CFI/TLI

CFI 0.902  
 TLI 0.907

Chi-Square Test of Model Fit for the Baseline Model

Value 59264.343  
 Degrees of Freedom 1540  
 P-Value 0.0000

SRMR (Standardized Root Mean Square Residual)

Value 0.049

MODEL RESULTS

|    |    | Estimate | S. E. | Est./S. E. | Two-Tailed<br>P-Value |
|----|----|----------|-------|------------|-----------------------|
| F1 | BY |          |       |            |                       |
|    | I1 | 1.000    | 0.000 | 999.000    | 999.000               |
|    | I2 | 1.022    | 0.027 | 37.406     | 0.000                 |

---

|     |       |       |         |         |
|-----|-------|-------|---------|---------|
| I3  | 1.038 | 0.027 | 38.454  | 0.000   |
| I4  | 1.123 | 0.045 | 25.128  | 0.000   |
| I5  | 1.135 | 0.034 | 33.241  | 0.000   |
| I6  | 1.092 | 0.030 | 35.940  | 0.000   |
| I7  | 1.054 | 0.025 | 41.564  | 0.000   |
| I8  | 1.003 | 0.025 | 39.551  | 0.000   |
| I9  | 1.057 | 0.026 | 40.878  | 0.000   |
| I10 | 1.024 | 0.025 | 41.300  | 0.000   |
| I11 | 1.050 | 0.025 | 41.848  | 0.000   |
| I12 | 1.019 | 0.025 | 40.697  | 0.000   |
| I13 | 1.056 | 0.038 | 27.894  | 0.000   |
| I14 | 1.057 | 0.027 | 39.779  | 0.000   |
| I15 | 1.055 | 0.039 | 27.140  | 0.000   |
| I16 | 1.010 | 0.028 | 36.262  | 0.000   |
| I17 | 1.071 | 0.029 | 37.269  | 0.000   |
| I18 | 1.066 | 0.029 | 36.387  | 0.000   |
| I19 | 1.058 | 0.027 | 38.464  | 0.000   |
| I20 | 1.037 | 0.029 | 35.726  | 0.000   |
| I21 | 1.019 | 0.029 | 34.649  | 0.000   |
| I22 | 1.004 | 0.028 | 35.843  | 0.000   |
| I23 | 1.009 | 0.028 | 35.643  | 0.000   |
| I24 | 1.016 | 0.031 | 32.296  | 0.000   |
| I25 | 0.939 | 0.027 | 34.997  | 0.000   |
| F2  | BY    |       |         |         |
| I26 | 1.000 | 0.000 | 999.000 | 999.000 |
| I27 | 0.962 | 0.028 | 34.349  | 0.000   |
| I28 | 0.995 | 0.037 | 26.789  | 0.000   |
| I29 | 1.012 | 0.025 | 40.313  | 0.000   |
| I30 | 1.038 | 0.025 | 40.963  | 0.000   |
| I31 | 1.010 | 0.026 | 39.109  | 0.000   |
| I32 | 1.085 | 0.026 | 41.065  | 0.000   |
| I33 | 1.082 | 0.026 | 41.372  | 0.000   |
| I34 | 1.068 | 0.026 | 41.516  | 0.000   |
| I35 | 1.099 | 0.027 | 40.958  | 0.000   |
| I36 | 1.101 | 0.025 | 43.257  | 0.000   |
| I37 | 1.138 | 0.027 | 42.217  | 0.000   |
| I38 | 1.110 | 0.025 | 43.909  | 0.000   |
| I39 | 1.083 | 0.026 | 42.146  | 0.000   |
| I40 | 0.969 | 0.024 | 40.584  | 0.000   |
| I41 | 1.052 | 0.025 | 41.505  | 0.000   |
| I42 | 1.031 | 0.037 | 27.929  | 0.000   |
| I43 | 1.080 | 0.040 | 27.023  | 0.000   |
| I44 | 1.009 | 0.025 | 40.070  | 0.000   |
| I45 | 1.062 | 0.025 | 42.990  | 0.000   |
| I46 | 0.982 | 0.027 | 36.557  | 0.000   |
| I47 | 1.077 | 0.035 | 30.694  | 0.000   |
| I48 | 1.036 | 0.025 | 41.412  | 0.000   |
| I49 | 1.041 | 0.025 | 41.362  | 0.000   |
| I50 | 1.064 | 0.027 | 38.965  | 0.000   |
| I51 | 1.024 | 0.025 | 41.092  | 0.000   |
| I52 | 1.001 | 0.025 | 40.468  | 0.000   |
| I53 | 1.013 | 0.026 | 38.930  | 0.000   |
| F3  | BY    |       |         |         |
| I54 | 1.000 | 0.000 | 999.000 | 999.000 |
| I55 | 0.908 | 0.026 | 34.857  | 0.000   |
| I56 | 0.931 | 0.036 | 25.756  | 0.000   |
| I57 | 0.810 | 0.027 | 29.613  | 0.000   |
| I58 | 0.905 | 0.023 | 38.519  | 0.000   |
| I59 | 0.930 | 0.037 | 25.459  | 0.000   |
| I60 | 0.923 | 0.035 | 26.176  | 0.000   |
| I61 | 0.897 | 0.037 | 24.399  | 0.000   |

---

---

|            |      |       |       |         |       |
|------------|------|-------|-------|---------|-------|
| I62        |      | 0.914 | 0.024 | 38.581  | 0.000 |
| I63        |      | 1.006 | 0.036 | 28.041  | 0.000 |
| I64        |      | 0.973 | 0.023 | 42.900  | 0.000 |
| I65        |      | 0.879 | 0.028 | 31.280  | 0.000 |
| I66        |      | 0.956 | 0.024 | 40.427  | 0.000 |
| I67        |      | 0.951 | 0.023 | 41.983  | 0.000 |
| I68        |      | 1.006 | 0.025 | 40.530  | 0.000 |
| I69        |      | 0.980 | 0.023 | 43.251  | 0.000 |
| I70        |      | 0.915 | 0.024 | 38.752  | 0.000 |
| I71        |      | 0.978 | 0.026 | 37.492  | 0.000 |
| I72        |      | 0.966 | 0.023 | 41.415  | 0.000 |
| I73        |      | 0.977 | 0.022 | 44.232  | 0.000 |
| I74        |      | 0.979 | 0.023 | 43.504  | 0.000 |
| I75        |      | 0.976 | 0.023 | 41.657  | 0.000 |
| I76        |      | 0.928 | 0.025 | 37.406  | 0.000 |
| I77        |      | 0.973 | 0.023 | 42.358  | 0.000 |
| I78        |      | 0.855 | 0.027 | 31.907  | 0.000 |
| I79        |      | 0.773 | 0.031 | 25.201  | 0.000 |
| I80        |      | 0.909 | 0.028 | 33.006  | 0.000 |
| I81        |      | 0.961 | 0.025 | 39.005  | 0.000 |
| I82        |      | 0.917 | 0.026 | 35.342  | 0.000 |
| I83        |      | 0.888 | 0.026 | 34.307  | 0.000 |
| F2         | WITH |       |       |         |       |
| F1         |      | 1.725 | 0.074 | 23.338  | 0.000 |
| F3         | WITH |       |       |         |       |
| F1         |      | 1.543 | 0.069 | 22.468  | 0.000 |
| F2         |      | 1.709 | 0.072 | 23.657  | 0.000 |
| Intercepts |      |       |       |         |       |
| I1         |      | 6.431 | 0.041 | 155.524 | 0.000 |
| I2         |      | 6.071 | 0.041 | 147.943 | 0.000 |
| I3         |      | 6.482 | 0.041 | 159.652 | 0.000 |
| I4         |      | 6.389 | 0.066 | 97.444  | 0.000 |
| I5         |      | 6.193 | 0.051 | 122.288 | 0.000 |
| I6         |      | 6.230 | 0.045 | 137.679 | 0.000 |
| I7         |      | 6.299 | 0.038 | 164.978 | 0.000 |
| I8         |      | 6.669 | 0.038 | 175.128 | 0.000 |
| I9         |      | 6.284 | 0.039 | 161.756 | 0.000 |
| I10        |      | 6.316 | 0.037 | 169.537 | 0.000 |
| I11        |      | 6.439 | 0.038 | 170.641 | 0.000 |
| I12        |      | 6.705 | 0.038 | 178.253 | 0.000 |
| I13        |      | 6.458 | 0.056 | 116.055 | 0.000 |
| I14        |      | 5.960 | 0.040 | 149.899 | 0.000 |
| I15        |      | 5.951 | 0.057 | 104.356 | 0.000 |
| I16        |      | 6.377 | 0.041 | 153.785 | 0.000 |
| I17        |      | 6.032 | 0.043 | 141.281 | 0.000 |
| I18        |      | 5.972 | 0.043 | 137.479 | 0.000 |
| I19        |      | 6.112 | 0.041 | 149.257 | 0.000 |
| I20        |      | 5.693 | 0.043 | 132.217 | 0.000 |
| I21        |      | 5.658 | 0.044 | 130.007 | 0.000 |
| I22        |      | 5.753 | 0.042 | 138.558 | 0.000 |
| I23        |      | 6.054 | 0.042 | 144.136 | 0.000 |
| I24        |      | 5.463 | 0.046 | 117.724 | 0.000 |
| I25        |      | 6.144 | 0.040 | 154.367 | 0.000 |
| I26        |      | 6.085 | 0.041 | 149.687 | 0.000 |
| I27        |      | 6.212 | 0.042 | 149.507 | 0.000 |
| I28        |      | 6.546 | 0.054 | 120.429 | 0.000 |
| I29        |      | 6.285 | 0.038 | 166.855 | 0.000 |
| I30        |      | 6.236 | 0.038 | 163.869 | 0.000 |
| I31        |      | 6.635 | 0.039 | 171.860 | 0.000 |
| I32        |      | 6.358 | 0.040 | 160.592 | 0.000 |

---

---

|                    |       |       |         |       |
|--------------------|-------|-------|---------|-------|
| I33                | 6.391 | 0.039 | 162.873 | 0.000 |
| I34                | 6.346 | 0.039 | 164.417 | 0.000 |
| I35                | 6.259 | 0.040 | 155.761 | 0.000 |
| I36                | 6.054 | 0.038 | 157.874 | 0.000 |
| I37                | 5.881 | 0.040 | 145.343 | 0.000 |
| I38                | 6.189 | 0.038 | 162.492 | 0.000 |
| I39                | 6.042 | 0.039 | 156.599 | 0.000 |
| I40                | 6.490 | 0.036 | 181.466 | 0.000 |
| I41                | 6.196 | 0.038 | 163.180 | 0.000 |
| I42                | 6.291 | 0.054 | 116.567 | 0.000 |
| I43                | 6.167 | 0.058 | 105.743 | 0.000 |
| I44                | 6.048 | 0.038 | 160.838 | 0.000 |
| I45                | 6.071 | 0.037 | 163.511 | 0.000 |
| I46                | 5.629 | 0.040 | 141.298 | 0.000 |
| I47                | 6.095 | 0.051 | 118.378 | 0.000 |
| I48                | 6.030 | 0.037 | 160.861 | 0.000 |
| I49                | 6.098 | 0.038 | 161.869 | 0.000 |
| I50                | 5.734 | 0.041 | 140.897 | 0.000 |
| I51                | 6.161 | 0.037 | 165.149 | 0.000 |
| I52                | 6.291 | 0.037 | 170.159 | 0.000 |
| I53                | 6.055 | 0.039 | 156.262 | 0.000 |
| I54                | 6.514 | 0.040 | 163.901 | 0.000 |
| I55                | 6.144 | 0.040 | 153.078 | 0.000 |
| I56                | 6.598 | 0.054 | 122.077 | 0.000 |
| I57                | 5.974 | 0.041 | 144.501 | 0.000 |
| I58                | 6.267 | 0.037 | 171.166 | 0.000 |
| I59                | 6.192 | 0.055 | 113.537 | 0.000 |
| I60                | 6.853 | 0.053 | 129.811 | 0.000 |
| I61                | 6.434 | 0.055 | 117.576 | 0.000 |
| I62                | 6.214 | 0.037 | 168.371 | 0.000 |
| I63                | 6.672 | 0.054 | 123.777 | 0.000 |
| I64                | 6.717 | 0.036 | 186.846 | 0.000 |
| I65                | 5.883 | 0.043 | 138.083 | 0.000 |
| I66                | 6.466 | 0.037 | 174.474 | 0.000 |
| I67                | 6.636 | 0.036 | 185.662 | 0.000 |
| I68                | 6.314 | 0.039 | 162.461 | 0.000 |
| I69                | 6.747 | 0.036 | 188.232 | 0.000 |
| I70                | 6.302 | 0.037 | 171.795 | 0.000 |
| I71                | 6.545 | 0.040 | 162.341 | 0.000 |
| I72                | 6.395 | 0.037 | 175.007 | 0.000 |
| I73                | 6.632 | 0.035 | 189.288 | 0.000 |
| I74                | 6.530 | 0.036 | 183.425 | 0.000 |
| I75                | 6.686 | 0.037 | 181.726 | 0.000 |
| I76                | 6.246 | 0.038 | 163.053 | 0.000 |
| I77                | 6.626 | 0.036 | 183.187 | 0.000 |
| I78                | 6.052 | 0.041 | 148.985 | 0.000 |
| I79                | 5.646 | 0.046 | 123.852 | 0.000 |
| I80                | 6.062 | 0.042 | 144.630 | 0.000 |
| I81                | 6.726 | 0.038 | 175.471 | 0.000 |
| I82                | 6.321 | 0.040 | 158.863 | 0.000 |
| I83                | 6.330 | 0.040 | 160.038 | 0.000 |
| Variances          |       |       |         |       |
| F1                 | 2.141 | 0.105 | 20.440  | 0.000 |
| F2                 | 2.087 | 0.101 | 20.634  | 0.000 |
| F3                 | 2.133 | 0.099 | 21.563  | 0.000 |
| Residual Variances |       |       |         |       |
| I1                 | 1.884 | 0.057 | 33.114  | 0.000 |
| I2                 | 1.727 | 0.052 | 32.972  | 0.000 |
| I3                 | 1.573 | 0.048 | 32.764  | 0.000 |
| I4                 | 7.419 | 0.219 | 33.929  | 0.000 |
| I5                 | 3.281 | 0.098 | 33.431  | 0.000 |

---

---

|     |       |       |        |       |
|-----|-------|-------|--------|-------|
| I6  | 2.269 | 0.068 | 33.144 | 0.000 |
| I7  | 1.053 | 0.033 | 31.906 | 0.000 |
| I8  | 1.260 | 0.039 | 32.446 | 0.000 |
| I9  | 1.159 | 0.036 | 32.109 | 0.000 |
| I10 | 1.020 | 0.032 | 32.045 | 0.000 |
| I11 | 0.990 | 0.031 | 31.801 | 0.000 |
| I12 | 1.109 | 0.034 | 32.198 | 0.000 |
| I13 | 4.901 | 0.145 | 33.823 | 0.000 |
| I14 | 1.329 | 0.041 | 32.523 | 0.000 |
| I15 | 5.272 | 0.156 | 33.857 | 0.000 |
| I16 | 1.864 | 0.056 | 33.131 | 0.000 |
| I17 | 1.835 | 0.056 | 32.790 | 0.000 |
| I18 | 2.009 | 0.061 | 32.904 | 0.000 |
| I19 | 1.552 | 0.048 | 32.612 | 0.000 |
| I20 | 2.065 | 0.063 | 33.020 | 0.000 |
| I21 | 2.233 | 0.067 | 33.136 | 0.000 |
| I22 | 1.900 | 0.058 | 32.979 | 0.000 |
| I23 | 1.976 | 0.060 | 33.098 | 0.000 |
| I24 | 2.857 | 0.085 | 33.465 | 0.000 |
| I25 | 1.840 | 0.055 | 33.204 | 0.000 |
| I26 | 1.803 | 0.054 | 33.505 | 0.000 |
| I27 | 2.135 | 0.063 | 33.674 | 0.000 |
| I28 | 4.889 | 0.144 | 34.016 | 0.000 |
| I29 | 1.203 | 0.036 | 33.021 | 0.000 |
| I30 | 1.161 | 0.035 | 32.913 | 0.000 |
| I31 | 1.378 | 0.042 | 33.186 | 0.000 |
| I32 | 1.235 | 0.038 | 32.725 | 0.000 |
| I33 | 1.180 | 0.036 | 32.634 | 0.000 |
| I34 | 1.127 | 0.034 | 32.751 | 0.000 |
| I35 | 1.281 | 0.039 | 32.807 | 0.000 |
| I36 | 0.930 | 0.029 | 32.379 | 0.000 |
| I37 | 1.152 | 0.035 | 32.630 | 0.000 |
| I38 | 0.845 | 0.026 | 32.132 | 0.000 |
| I39 | 1.056 | 0.032 | 32.674 | 0.000 |
| I40 | 1.050 | 0.032 | 33.022 | 0.000 |
| I41 | 1.086 | 0.033 | 32.859 | 0.000 |
| I42 | 4.639 | 0.136 | 33.987 | 0.000 |
| I43 | 5.573 | 0.164 | 34.016 | 0.000 |
| I44 | 1.206 | 0.036 | 33.070 | 0.000 |
| I45 | 0.894 | 0.028 | 32.471 | 0.000 |
| I46 | 1.725 | 0.052 | 33.490 | 0.000 |
| I47 | 3.822 | 0.113 | 33.876 | 0.000 |
| I48 | 1.066 | 0.033 | 32.763 | 0.000 |
| I49 | 1.079 | 0.033 | 32.742 | 0.000 |
| I50 | 1.536 | 0.046 | 33.199 | 0.000 |
| I51 | 1.087 | 0.033 | 32.789 | 0.000 |
| I52 | 1.128 | 0.034 | 32.942 | 0.000 |
| I53 | 1.394 | 0.042 | 33.193 | 0.000 |
| I54 | 1.586 | 0.048 | 32.990 | 0.000 |
| I55 | 2.032 | 0.061 | 33.449 | 0.000 |
| I56 | 5.027 | 0.148 | 33.944 | 0.000 |
| I57 | 2.623 | 0.078 | 33.779 | 0.000 |
| I58 | 1.410 | 0.043 | 33.075 | 0.000 |
| I59 | 5.156 | 0.152 | 33.956 | 0.000 |
| I60 | 4.741 | 0.140 | 33.931 | 0.000 |
| I61 | 5.334 | 0.157 | 34.004 | 0.000 |
| I62 | 1.423 | 0.043 | 33.081 | 0.000 |
| I63 | 4.682 | 0.138 | 33.851 | 0.000 |
| I64 | 1.022 | 0.032 | 32.314 | 0.000 |
| I65 | 2.624 | 0.078 | 33.698 | 0.000 |
| I66 | 1.283 | 0.039 | 32.792 | 0.000 |
| I67 | 1.076 | 0.033 | 32.529 | 0.000 |
| I68 | 1.396 | 0.043 | 32.833 | 0.000 |

---

---

|     |       |       |        |       |
|-----|-------|-------|--------|-------|
| I69 | 0.976 | 0.030 | 32.272 | 0.000 |
| I70 | 1.380 | 0.042 | 33.067 | 0.000 |
| I71 | 1.784 | 0.054 | 33.203 | 0.000 |
| I72 | 1.153 | 0.035 | 32.618 | 0.000 |
| I73 | 0.851 | 0.027 | 31.918 | 0.000 |
| I74 | 0.938 | 0.029 | 32.152 | 0.000 |
| I75 | 1.155 | 0.035 | 32.576 | 0.000 |
| I76 | 1.616 | 0.049 | 33.197 | 0.000 |
| I77 | 1.060 | 0.033 | 32.480 | 0.000 |
| I78 | 2.327 | 0.069 | 33.646 | 0.000 |
| I79 | 3.618 | 0.107 | 33.948 | 0.000 |
| I80 | 2.372 | 0.071 | 33.574 | 0.000 |
| I81 | 1.487 | 0.045 | 33.041 | 0.000 |
| I82 | 1.935 | 0.058 | 33.407 | 0.000 |
| I83 | 2.001 | 0.060 | 33.485 | 0.000 |

## STANDARDIZED MODEL RESULTS

## STDYX Standardization

|     |    | Estimate | S. E. | Est. /S. E. | Two-Tailed<br>P-Value |
|-----|----|----------|-------|-------------|-----------------------|
| F1  | BY |          |       |             |                       |
| I1  |    | 0.729    | 0.010 | 73.111      | 0.000                 |
| I2  |    | 0.751    | 0.009 | 80.735      | 0.000                 |
| I3  |    | 0.771    | 0.009 | 88.780      | 0.000                 |
| I4  |    | 0.617    | 0.015 | 33.488      | 0.000                 |
| I5  |    | 0.676    | 0.012 | 58.640      | 0.000                 |
| I6  |    | 0.727    | 0.010 | 72.563      | 0.000                 |
| I7  |    | 0.832    | 0.007 | 124.749     | 0.000                 |
| I8  |    | 0.794    | 0.008 | 99.870      | 0.000                 |
| I9  |    | 0.821    | 0.007 | 116.160     | 0.000                 |
| I10 |    | 0.829    | 0.007 | 122.499     | 0.000                 |
| I11 |    | 0.839    | 0.006 | 130.444     | 0.000                 |
| I12 |    | 0.817    | 0.007 | 113.406     | 0.000                 |
| I13 |    | 0.672    | 0.014 | 40.432      | 0.000                 |
| I14 |    | 0.802    | 0.008 | 104.458     | 0.000                 |
| I15 |    | 0.658    | 0.014 | 38.477      | 0.000                 |
| I16 |    | 0.735    | 0.010 | 74.927      | 0.000                 |
| I17 |    | 0.757    | 0.009 | 82.479      | 0.000                 |
| I18 |    | 0.740    | 0.010 | 76.424      | 0.000                 |
| I19 |    | 0.779    | 0.008 | 92.142      | 0.000                 |
| I20 |    | 0.726    | 0.010 | 71.805      | 0.000                 |
| I21 |    | 0.706    | 0.011 | 66.067      | 0.000                 |
| I22 |    | 0.729    | 0.010 | 72.798      | 0.000                 |
| I23 |    | 0.724    | 0.010 | 71.370      | 0.000                 |
| I24 |    | 0.661    | 0.012 | 55.266      | 0.000                 |
| I25 |    | 0.712    | 0.011 | 67.773      | 0.000                 |
| F2  | BY |          |       |             |                       |
| I26 |    | 0.732    | 0.010 | 74.980      | 0.000                 |
| I27 |    | 0.689    | 0.011 | 62.411      | 0.000                 |
| I28 |    | 0.645    | 0.015 | 37.089      | 0.000                 |
| I29 |    | 0.800    | 0.008 | 104.491     | 0.000                 |
| I30 |    | 0.812    | 0.007 | 112.084     | 0.000                 |
| I31 |    | 0.779    | 0.008 | 93.645      | 0.000                 |
| I32 |    | 0.816    | 0.007 | 114.067     | 0.000                 |
| I33 |    | 0.821    | 0.007 | 117.930     | 0.000                 |
| I34 |    | 0.824    | 0.007 | 120.191     | 0.000                 |
| I35 |    | 0.814    | 0.007 | 113.294     | 0.000                 |

---

|            |      |       |       |         |       |
|------------|------|-------|-------|---------|-------|
| I36        |      | 0.855 | 0.006 | 148.295 | 0.000 |
| I37        |      | 0.837 | 0.006 | 131.089 | 0.000 |
| I38        |      | 0.868 | 0.005 | 162.739 | 0.000 |
| I39        |      | 0.836 | 0.006 | 129.867 | 0.000 |
| I40        |      | 0.807 | 0.007 | 108.959 | 0.000 |
| I41        |      | 0.825 | 0.007 | 121.064 | 0.000 |
| I42        |      | 0.669 | 0.014 | 40.208  | 0.000 |
| I43        |      | 0.651 | 0.015 | 37.877  | 0.000 |
| I44        |      | 0.799 | 0.008 | 103.862 | 0.000 |
| I45        |      | 0.851 | 0.006 | 144.306 | 0.000 |
| I46        |      | 0.734 | 0.010 | 75.381  | 0.000 |
| I47        |      | 0.623 | 0.013 | 48.524  | 0.000 |
| I48        |      | 0.823 | 0.007 | 119.770 | 0.000 |
| I49        |      | 0.823 | 0.007 | 119.297 | 0.000 |
| I50        |      | 0.779 | 0.008 | 93.313  | 0.000 |
| I51        |      | 0.817 | 0.007 | 115.461 | 0.000 |
| I52        |      | 0.806 | 0.007 | 108.035 | 0.000 |
| I53        |      | 0.778 | 0.008 | 93.185  | 0.000 |
| F3         | BY   |       |       |         |       |
| I54        |      | 0.757 | 0.009 | 83.282  | 0.000 |
| I55        |      | 0.681 | 0.011 | 60.037  | 0.000 |
| I56        |      | 0.619 | 0.015 | 33.746  | 0.000 |
| I57        |      | 0.590 | 0.014 | 42.940  | 0.000 |
| I58        |      | 0.744 | 0.010 | 78.171  | 0.000 |
| I59        |      | 0.613 | 0.015 | 33.182  | 0.000 |
| I60        |      | 0.627 | 0.015 | 34.656  | 0.000 |
| I61        |      | 0.693 | 0.016 | 31.059  | 0.000 |
| I62        |      | 0.746 | 0.009 | 78.894  | 0.000 |
| I63        |      | 0.662 | 0.014 | 38.977  | 0.000 |
| I64        |      | 0.815 | 0.007 | 112.438 | 0.000 |
| I65        |      | 0.621 | 0.013 | 47.942  | 0.000 |
| I66        |      | 0.777 | 0.008 | 91.418  | 0.000 |
| I67        |      | 0.801 | 0.008 | 104.168 | 0.000 |
| I68        |      | 0.779 | 0.008 | 92.845  | 0.000 |
| I69        |      | 0.823 | 0.007 | 118.220 | 0.000 |
| I70        |      | 0.751 | 0.009 | 80.965  | 0.000 |
| I71        |      | 0.731 | 0.010 | 73.701  | 0.000 |
| I72        |      | 0.796 | 0.008 | 101.072 | 0.000 |
| I73        |      | 0.840 | 0.006 | 131.297 | 0.000 |
| I74        |      | 0.828 | 0.007 | 121.835 | 0.000 |
| I75        |      | 0.798 | 0.008 | 102.593 | 0.000 |
| I76        |      | 0.729 | 0.010 | 73.310  | 0.000 |
| I77        |      | 0.810 | 0.007 | 109.456 | 0.000 |
| I78        |      | 0.633 | 0.013 | 50.083  | 0.000 |
| I79        |      | 0.610 | 0.016 | 32.808  | 0.000 |
| I80        |      | 0.653 | 0.012 | 53.848  | 0.000 |
| I81        |      | 0.755 | 0.009 | 82.425  | 0.000 |
| I82        |      | 0.693 | 0.011 | 63.037  | 0.000 |
| I83        |      | 0.676 | 0.012 | 58.758  | 0.000 |
| F2         | WITH |       |       |         |       |
| F1         |      | 0.816 | 0.007 | 109.649 | 0.000 |
| F3         | WITH |       |       |         |       |
| F1         |      | 0.722 | 0.011 | 68.736  | 0.000 |
| F2         |      | 0.810 | 0.008 | 106.346 | 0.000 |
| Intercepts |      |       |       |         |       |
| I1         |      | 3.205 | 0.051 | 62.776  | 0.000 |
| I2         |      | 3.049 | 0.049 | 62.246  | 0.000 |
| I3         |      | 3.291 | 0.052 | 63.039  | 0.000 |
| I4         |      | 2.008 | 0.036 | 56.102  | 0.000 |

---



---

|     |       |       |        |       |
|-----|-------|-------|--------|-------|
| I5  | 2.520 | 0.042 | 59.839 | 0.000 |
| I6  | 2.838 | 0.046 | 61.411 | 0.000 |
| I7  | 3.400 | 0.054 | 63.354 | 0.000 |
| I8  | 3.610 | 0.056 | 63.886 | 0.000 |
| I9  | 3.334 | 0.053 | 63.167 | 0.000 |
| I10 | 3.494 | 0.055 | 63.603 | 0.000 |
| I11 | 3.517 | 0.055 | 63.661 | 0.000 |
| I12 | 3.674 | 0.057 | 64.034 | 0.000 |
| I13 | 2.392 | 0.040 | 59.064 | 0.000 |
| I14 | 3.090 | 0.050 | 62.389 | 0.000 |
| I15 | 2.151 | 0.038 | 57.332 | 0.000 |
| I16 | 3.170 | 0.051 | 62.661 | 0.000 |
| I17 | 2.912 | 0.047 | 61.721 | 0.000 |
| I18 | 2.834 | 0.046 | 61.393 | 0.000 |
| I19 | 3.076 | 0.049 | 62.343 | 0.000 |
| I20 | 2.725 | 0.045 | 60.902 | 0.000 |
| I21 | 2.680 | 0.044 | 60.682 | 0.000 |
| I22 | 2.856 | 0.046 | 61.488 | 0.000 |
| I23 | 2.971 | 0.048 | 61.953 | 0.000 |
| I24 | 2.426 | 0.041 | 59.281 | 0.000 |
| I25 | 3.182 | 0.051 | 62.700 | 0.000 |
| I26 | 3.085 | 0.049 | 62.374 | 0.000 |
| I27 | 3.081 | 0.049 | 62.361 | 0.000 |
| I28 | 2.482 | 0.042 | 59.617 | 0.000 |
| I29 | 3.439 | 0.054 | 63.459 | 0.000 |
| I30 | 3.377 | 0.053 | 63.291 | 0.000 |
| I31 | 3.542 | 0.056 | 63.724 | 0.000 |
| I32 | 3.310 | 0.052 | 63.097 | 0.000 |
| I33 | 3.357 | 0.053 | 63.233 | 0.000 |
| I34 | 3.389 | 0.054 | 63.322 | 0.000 |
| I35 | 3.210 | 0.051 | 62.792 | 0.000 |
| I36 | 3.254 | 0.052 | 62.928 | 0.000 |
| I37 | 2.996 | 0.048 | 62.048 | 0.000 |
| I38 | 3.349 | 0.053 | 63.210 | 0.000 |
| I39 | 3.228 | 0.051 | 62.847 | 0.000 |
| I40 | 3.740 | 0.058 | 64.180 | 0.000 |
| I41 | 3.363 | 0.053 | 63.251 | 0.000 |
| I42 | 2.403 | 0.041 | 59.131 | 0.000 |
| I43 | 2.179 | 0.038 | 57.559 | 0.000 |
| I44 | 3.315 | 0.053 | 63.112 | 0.000 |
| I45 | 3.370 | 0.053 | 63.270 | 0.000 |
| I46 | 2.912 | 0.047 | 61.722 | 0.000 |
| I47 | 2.440 | 0.041 | 59.364 | 0.000 |
| I48 | 3.315 | 0.053 | 63.113 | 0.000 |
| I49 | 3.336 | 0.053 | 63.174 | 0.000 |
| I50 | 2.904 | 0.047 | 61.689 | 0.000 |
| I51 | 3.404 | 0.054 | 63.364 | 0.000 |
| I52 | 3.507 | 0.055 | 63.636 | 0.000 |
| I53 | 3.221 | 0.051 | 62.825 | 0.000 |
| I54 | 3.378 | 0.053 | 63.293 | 0.000 |
| I55 | 3.155 | 0.050 | 62.613 | 0.000 |
| I56 | 2.516 | 0.042 | 59.814 | 0.000 |
| I57 | 2.978 | 0.048 | 61.982 | 0.000 |
| I58 | 3.528 | 0.055 | 63.688 | 0.000 |
| I59 | 2.340 | 0.040 | 58.724 | 0.000 |
| I60 | 2.676 | 0.044 | 60.662 | 0.000 |
| I61 | 2.423 | 0.041 | 59.262 | 0.000 |
| I62 | 3.470 | 0.055 | 63.541 | 0.000 |
| I63 | 2.551 | 0.043 | 60.011 | 0.000 |
| I64 | 3.851 | 0.060 | 64.409 | 0.000 |
| I65 | 2.846 | 0.046 | 61.447 | 0.000 |
| I66 | 3.596 | 0.056 | 63.854 | 0.000 |
| I67 | 3.827 | 0.059 | 64.360 | 0.000 |

---

|                    |       |       |         |         |
|--------------------|-------|-------|---------|---------|
| I68                | 3.348 | 0.053 | 63.209  | 0.000   |
| I69                | 3.880 | 0.060 | 64.465  | 0.000   |
| I70                | 3.541 | 0.056 | 63.720  | 0.000   |
| I71                | 3.346 | 0.053 | 63.202  | 0.000   |
| I72                | 3.607 | 0.056 | 63.881  | 0.000   |
| I73                | 3.901 | 0.060 | 64.508  | 0.000   |
| I74                | 3.781 | 0.059 | 64.266  | 0.000   |
| I75                | 3.746 | 0.058 | 64.192  | 0.000   |
| I76                | 3.361 | 0.053 | 63.243  | 0.000   |
| I77                | 3.776 | 0.059 | 64.255  | 0.000   |
| I78                | 3.071 | 0.049 | 62.323  | 0.000   |
| I79                | 2.553 | 0.043 | 60.020  | 0.000   |
| I80                | 2.981 | 0.048 | 61.992  | 0.000   |
| I81                | 3.617 | 0.057 | 63.903  | 0.000   |
| I82                | 3.274 | 0.052 | 62.991  | 0.000   |
| I83                | 3.299 | 0.052 | 63.063  | 0.000   |
| Variances          |       |       |         |         |
| F1                 | 1.000 | 0.000 | 999.000 | 999.000 |
| F2                 | 1.000 | 0.000 | 999.000 | 999.000 |
| F3                 | 1.000 | 0.000 | 999.000 | 999.000 |
| Residual Variances |       |       |         |         |
| I1                 | 0.468 | 0.015 | 32.172  | 0.000   |
| I2                 | 0.436 | 0.014 | 31.174  | 0.000   |
| I3                 | 0.405 | 0.013 | 30.255  | 0.000   |
| I4                 | 0.733 | 0.016 | 46.003  | 0.000   |
| I5                 | 0.543 | 0.016 | 34.903  | 0.000   |
| I6                 | 0.471 | 0.015 | 32.276  | 0.000   |
| I7                 | 0.307 | 0.011 | 27.625  | 0.000   |
| I8                 | 0.369 | 0.013 | 29.204  | 0.000   |
| I9                 | 0.326 | 0.012 | 28.112  | 0.000   |
| I10                | 0.312 | 0.011 | 27.812  | 0.000   |
| I11                | 0.295 | 0.011 | 27.355  | 0.000   |
| I12                | 0.333 | 0.012 | 28.302  | 0.000   |
| I13                | 0.672 | 0.016 | 41.473  | 0.000   |
| I14                | 0.357 | 0.012 | 29.010  | 0.000   |
| I15                | 0.689 | 0.016 | 42.578  | 0.000   |
| I16                | 0.460 | 0.014 | 31.973  | 0.000   |
| I17                | 0.428 | 0.014 | 30.817  | 0.000   |
| I18                | 0.452 | 0.014 | 31.547  | 0.000   |
| I19                | 0.393 | 0.013 | 29.858  | 0.000   |
| I20                | 0.473 | 0.015 | 32.223  | 0.000   |
| I21                | 0.501 | 0.015 | 33.167  | 0.000   |
| I22                | 0.468 | 0.015 | 32.052  | 0.000   |
| I23                | 0.476 | 0.015 | 32.373  | 0.000   |
| I24                | 0.564 | 0.016 | 35.697  | 0.000   |
| I25                | 0.493 | 0.015 | 32.999  | 0.000   |
| I26                | 0.464 | 0.014 | 32.399  | 0.000   |
| I27                | 0.525 | 0.015 | 34.524  | 0.000   |
| I28                | 0.703 | 0.016 | 43.875  | 0.000   |
| I29                | 0.360 | 0.012 | 29.432  | 0.000   |
| I30                | 0.341 | 0.012 | 28.938  | 0.000   |
| I31                | 0.393 | 0.013 | 30.286  | 0.000   |
| I32                | 0.335 | 0.012 | 28.693  | 0.000   |
| I33                | 0.325 | 0.011 | 28.449  | 0.000   |
| I34                | 0.321 | 0.011 | 28.444  | 0.000   |
| I35                | 0.337 | 0.012 | 28.795  | 0.000   |
| I36                | 0.269 | 0.010 | 27.249  | 0.000   |
| I37                | 0.299 | 0.011 | 27.940  | 0.000   |
| I38                | 0.247 | 0.009 | 26.747  | 0.000   |
| I39                | 0.301 | 0.011 | 28.015  | 0.000   |
| I40                | 0.349 | 0.012 | 29.187  | 0.000   |

---

---

|     |       |       |        |       |
|-----|-------|-------|--------|-------|
| I41 | 0.320 | 0.011 | 28.491 | 0.000 |
| I42 | 0.676 | 0.016 | 42.039 | 0.000 |
| I43 | 0.696 | 0.016 | 43.402 | 0.000 |
| I44 | 0.362 | 0.012 | 29.510 | 0.000 |
| I45 | 0.275 | 0.010 | 27.419 | 0.000 |
| I46 | 0.462 | 0.014 | 32.331 | 0.000 |
| I47 | 0.612 | 0.016 | 38.338 | 0.000 |
| I48 | 0.322 | 0.011 | 28.471 | 0.000 |
| I49 | 0.323 | 0.011 | 28.475 | 0.000 |
| I50 | 0.394 | 0.013 | 30.323 | 0.000 |
| I51 | 0.332 | 0.012 | 28.680 | 0.000 |
| I52 | 0.351 | 0.012 | 29.169 | 0.000 |
| I53 | 0.394 | 0.013 | 30.327 | 0.000 |
| I54 | 0.426 | 0.014 | 30.950 | 0.000 |
| I55 | 0.536 | 0.015 | 34.648 | 0.000 |
| I56 | 0.731 | 0.016 | 45.871 | 0.000 |
| I57 | 0.652 | 0.016 | 40.220 | 0.000 |
| I58 | 0.447 | 0.014 | 31.547 | 0.000 |
| I59 | 0.736 | 0.016 | 46.341 | 0.000 |
| I60 | 0.723 | 0.016 | 45.171 | 0.000 |
| I61 | 0.757 | 0.016 | 48.299 | 0.000 |
| I62 | 0.444 | 0.014 | 31.477 | 0.000 |
| I63 | 0.685 | 0.016 | 42.291 | 0.000 |
| I64 | 0.336 | 0.012 | 28.438 | 0.000 |
| I65 | 0.614 | 0.016 | 38.164 | 0.000 |
| I66 | 0.397 | 0.013 | 30.081 | 0.000 |
| I67 | 0.358 | 0.012 | 29.031 | 0.000 |
| I68 | 0.393 | 0.013 | 30.014 | 0.000 |
| I69 | 0.323 | 0.011 | 28.155 | 0.000 |
| I70 | 0.436 | 0.014 | 31.251 | 0.000 |
| I71 | 0.466 | 0.014 | 32.204 | 0.000 |
| I72 | 0.367 | 0.013 | 29.284 | 0.000 |
| I73 | 0.295 | 0.011 | 27.414 | 0.000 |
| I74 | 0.314 | 0.011 | 27.919 | 0.000 |
| I75 | 0.362 | 0.012 | 29.160 | 0.000 |
| I76 | 0.468 | 0.015 | 32.245 | 0.000 |
| I77 | 0.344 | 0.012 | 28.715 | 0.000 |
| I78 | 0.599 | 0.016 | 37.389 | 0.000 |
| I79 | 0.740 | 0.016 | 46.599 | 0.000 |
| I80 | 0.574 | 0.016 | 36.227 | 0.000 |
| I81 | 0.430 | 0.014 | 31.083 | 0.000 |
| I82 | 0.519 | 0.015 | 34.031 | 0.000 |
| I83 | 0.543 | 0.016 | 34.961 | 0.000 |

## STDY Standardization

|    |     | Estimate | S. E. | Est. /S. E. | Two-Tailed<br>P-Value |
|----|-----|----------|-------|-------------|-----------------------|
| F1 | BY  |          |       |             |                       |
|    | I1  | 0.729    | 0.010 | 73.111      | 0.000                 |
|    | I2  | 0.751    | 0.009 | 80.735      | 0.000                 |
|    | I3  | 0.771    | 0.009 | 88.780      | 0.000                 |
|    | I4  | 0.617    | 0.015 | 33.488      | 0.000                 |
|    | I5  | 0.676    | 0.012 | 58.640      | 0.000                 |
|    | I6  | 0.727    | 0.010 | 72.563      | 0.000                 |
|    | I7  | 0.832    | 0.007 | 124.749     | 0.000                 |
|    | I8  | 0.794    | 0.008 | 99.870      | 0.000                 |
|    | I9  | 0.821    | 0.007 | 116.160     | 0.000                 |
|    | I10 | 0.829    | 0.007 | 122.499     | 0.000                 |
|    | I11 | 0.839    | 0.006 | 130.444     | 0.000                 |
|    | I12 | 0.817    | 0.007 | 113.406     | 0.000                 |

---

|     |       |       |         |       |
|-----|-------|-------|---------|-------|
| I13 | 0.672 | 0.014 | 40.432  | 0.000 |
| I14 | 0.802 | 0.008 | 104.458 | 0.000 |
| I15 | 0.658 | 0.014 | 38.477  | 0.000 |
| I16 | 0.735 | 0.010 | 74.927  | 0.000 |
| I17 | 0.757 | 0.009 | 82.479  | 0.000 |
| I18 | 0.740 | 0.010 | 76.424  | 0.000 |
| I19 | 0.779 | 0.008 | 92.142  | 0.000 |
| I20 | 0.726 | 0.010 | 71.805  | 0.000 |
| I21 | 0.706 | 0.011 | 66.067  | 0.000 |
| I22 | 0.729 | 0.010 | 72.798  | 0.000 |
| I23 | 0.724 | 0.010 | 71.370  | 0.000 |
| I24 | 0.661 | 0.012 | 55.266  | 0.000 |
| I25 | 0.712 | 0.011 | 67.773  | 0.000 |
| F2  | BY    |       |         |       |
| I26 | 0.732 | 0.010 | 74.980  | 0.000 |
| I27 | 0.689 | 0.011 | 62.411  | 0.000 |
| I28 | 0.645 | 0.015 | 37.089  | 0.000 |
| I29 | 0.800 | 0.008 | 104.491 | 0.000 |
| I30 | 0.812 | 0.007 | 112.084 | 0.000 |
| I31 | 0.779 | 0.008 | 93.645  | 0.000 |
| I32 | 0.816 | 0.007 | 114.067 | 0.000 |
| I33 | 0.821 | 0.007 | 117.930 | 0.000 |
| I34 | 0.824 | 0.007 | 120.191 | 0.000 |
| I35 | 0.814 | 0.007 | 113.294 | 0.000 |
| I36 | 0.855 | 0.006 | 148.295 | 0.000 |
| I37 | 0.837 | 0.006 | 131.089 | 0.000 |
| I38 | 0.868 | 0.005 | 162.739 | 0.000 |
| I39 | 0.836 | 0.006 | 129.867 | 0.000 |
| I40 | 0.807 | 0.007 | 108.959 | 0.000 |
| I41 | 0.825 | 0.007 | 121.064 | 0.000 |
| I42 | 0.669 | 0.014 | 40.208  | 0.000 |
| I43 | 0.651 | 0.015 | 37.877  | 0.000 |
| I44 | 0.799 | 0.008 | 103.862 | 0.000 |
| I45 | 0.851 | 0.006 | 144.306 | 0.000 |
| I46 | 0.734 | 0.010 | 75.381  | 0.000 |
| I47 | 0.623 | 0.013 | 48.524  | 0.000 |
| I48 | 0.823 | 0.007 | 119.770 | 0.000 |
| I49 | 0.823 | 0.007 | 119.297 | 0.000 |
| I50 | 0.779 | 0.008 | 93.313  | 0.000 |
| I51 | 0.817 | 0.007 | 115.461 | 0.000 |
| I52 | 0.806 | 0.007 | 108.035 | 0.000 |
| I53 | 0.778 | 0.008 | 93.185  | 0.000 |
| F3  | BY    |       |         |       |
| I54 | 0.757 | 0.009 | 83.282  | 0.000 |
| I55 | 0.681 | 0.011 | 60.037  | 0.000 |
| I56 | 0.619 | 0.015 | 33.746  | 0.000 |
| I57 | 0.590 | 0.014 | 42.940  | 0.000 |
| I58 | 0.744 | 0.010 | 78.171  | 0.000 |
| I59 | 0.613 | 0.015 | 33.182  | 0.000 |
| I60 | 0.627 | 0.015 | 34.656  | 0.000 |
| I61 | 0.693 | 0.016 | 31.059  | 0.000 |
| I62 | 0.746 | 0.009 | 78.894  | 0.000 |
| I63 | 0.662 | 0.014 | 38.977  | 0.000 |
| I64 | 0.815 | 0.007 | 112.438 | 0.000 |
| I65 | 0.621 | 0.013 | 47.942  | 0.000 |
| I66 | 0.777 | 0.008 | 91.418  | 0.000 |
| I67 | 0.801 | 0.008 | 104.168 | 0.000 |
| I68 | 0.779 | 0.008 | 92.845  | 0.000 |
| I69 | 0.823 | 0.007 | 118.220 | 0.000 |
| I70 | 0.751 | 0.009 | 80.965  | 0.000 |
| I71 | 0.731 | 0.010 | 73.701  | 0.000 |

---

---

|            |      |       |       |         |       |
|------------|------|-------|-------|---------|-------|
| I72        |      | 0.796 | 0.008 | 101.072 | 0.000 |
| I73        |      | 0.840 | 0.006 | 131.297 | 0.000 |
| I74        |      | 0.828 | 0.007 | 121.835 | 0.000 |
| I75        |      | 0.798 | 0.008 | 102.593 | 0.000 |
| I76        |      | 0.729 | 0.010 | 73.310  | 0.000 |
| I77        |      | 0.810 | 0.007 | 109.456 | 0.000 |
| I78        |      | 0.633 | 0.013 | 50.083  | 0.000 |
| I79        |      | 0.610 | 0.016 | 32.808  | 0.000 |
| I80        |      | 0.653 | 0.012 | 53.848  | 0.000 |
| I81        |      | 0.755 | 0.009 | 82.425  | 0.000 |
| I82        |      | 0.693 | 0.011 | 63.037  | 0.000 |
| I83        |      | 0.676 | 0.012 | 58.758  | 0.000 |
| F2         | WITH |       |       |         |       |
| F1         |      | 0.816 | 0.007 | 109.649 | 0.000 |
| F3         | WITH |       |       |         |       |
| F1         |      | 0.722 | 0.011 | 68.736  | 0.000 |
| F2         |      | 0.810 | 0.008 | 106.346 | 0.000 |
| Intercepts |      |       |       |         |       |
| I1         |      | 3.205 | 0.051 | 62.776  | 0.000 |
| I2         |      | 3.049 | 0.049 | 62.246  | 0.000 |
| I3         |      | 3.291 | 0.052 | 63.039  | 0.000 |
| I4         |      | 2.008 | 0.036 | 56.102  | 0.000 |
| I5         |      | 2.520 | 0.042 | 59.839  | 0.000 |
| I6         |      | 2.838 | 0.046 | 61.411  | 0.000 |
| I7         |      | 3.400 | 0.054 | 63.354  | 0.000 |
| I8         |      | 3.610 | 0.056 | 63.886  | 0.000 |
| I9         |      | 3.334 | 0.053 | 63.167  | 0.000 |
| I10        |      | 3.494 | 0.055 | 63.603  | 0.000 |
| I11        |      | 3.517 | 0.055 | 63.661  | 0.000 |
| I12        |      | 3.674 | 0.057 | 64.034  | 0.000 |
| I13        |      | 2.392 | 0.040 | 59.064  | 0.000 |
| I14        |      | 3.090 | 0.050 | 62.389  | 0.000 |
| I15        |      | 2.151 | 0.038 | 57.332  | 0.000 |
| I16        |      | 3.170 | 0.051 | 62.661  | 0.000 |
| I17        |      | 2.912 | 0.047 | 61.721  | 0.000 |
| I18        |      | 2.834 | 0.046 | 61.393  | 0.000 |
| I19        |      | 3.076 | 0.049 | 62.343  | 0.000 |
| I20        |      | 2.725 | 0.045 | 60.902  | 0.000 |
| I21        |      | 2.680 | 0.044 | 60.682  | 0.000 |
| I22        |      | 2.856 | 0.046 | 61.488  | 0.000 |
| I23        |      | 2.971 | 0.048 | 61.953  | 0.000 |
| I24        |      | 2.426 | 0.041 | 59.281  | 0.000 |
| I25        |      | 3.182 | 0.051 | 62.700  | 0.000 |
| I26        |      | 3.085 | 0.049 | 62.374  | 0.000 |
| I27        |      | 3.081 | 0.049 | 62.361  | 0.000 |
| I28        |      | 2.482 | 0.042 | 59.617  | 0.000 |
| I29        |      | 3.439 | 0.054 | 63.459  | 0.000 |
| I30        |      | 3.377 | 0.053 | 63.291  | 0.000 |
| I31        |      | 3.542 | 0.056 | 63.724  | 0.000 |
| I32        |      | 3.310 | 0.052 | 63.097  | 0.000 |
| I33        |      | 3.357 | 0.053 | 63.233  | 0.000 |
| I34        |      | 3.389 | 0.054 | 63.322  | 0.000 |
| I35        |      | 3.210 | 0.051 | 62.792  | 0.000 |
| I36        |      | 3.254 | 0.052 | 62.928  | 0.000 |
| I37        |      | 2.996 | 0.048 | 62.048  | 0.000 |
| I38        |      | 3.349 | 0.053 | 63.210  | 0.000 |
| I39        |      | 3.228 | 0.051 | 62.847  | 0.000 |
| I40        |      | 3.740 | 0.058 | 64.180  | 0.000 |
| I41        |      | 3.363 | 0.053 | 63.251  | 0.000 |
| I42        |      | 2.403 | 0.041 | 59.131  | 0.000 |

---

---

|                    |       |       |         |         |
|--------------------|-------|-------|---------|---------|
| I43                | 2.179 | 0.038 | 57.559  | 0.000   |
| I44                | 3.315 | 0.053 | 63.112  | 0.000   |
| I45                | 3.370 | 0.053 | 63.270  | 0.000   |
| I46                | 2.912 | 0.047 | 61.722  | 0.000   |
| I47                | 2.440 | 0.041 | 59.364  | 0.000   |
| I48                | 3.315 | 0.053 | 63.113  | 0.000   |
| I49                | 3.336 | 0.053 | 63.174  | 0.000   |
| I50                | 2.904 | 0.047 | 61.689  | 0.000   |
| I51                | 3.404 | 0.054 | 63.364  | 0.000   |
| I52                | 3.507 | 0.055 | 63.636  | 0.000   |
| I53                | 3.221 | 0.051 | 62.825  | 0.000   |
| I54                | 3.378 | 0.053 | 63.293  | 0.000   |
| I55                | 3.155 | 0.050 | 62.613  | 0.000   |
| I56                | 2.516 | 0.042 | 59.814  | 0.000   |
| I57                | 2.978 | 0.048 | 61.982  | 0.000   |
| I58                | 3.528 | 0.055 | 63.688  | 0.000   |
| I59                | 2.340 | 0.040 | 58.724  | 0.000   |
| I60                | 2.676 | 0.044 | 60.662  | 0.000   |
| I61                | 2.423 | 0.041 | 59.262  | 0.000   |
| I62                | 3.470 | 0.055 | 63.541  | 0.000   |
| I63                | 2.551 | 0.043 | 60.011  | 0.000   |
| I64                | 3.851 | 0.060 | 64.409  | 0.000   |
| I65                | 2.846 | 0.046 | 61.447  | 0.000   |
| I66                | 3.596 | 0.056 | 63.854  | 0.000   |
| I67                | 3.827 | 0.059 | 64.360  | 0.000   |
| I68                | 3.348 | 0.053 | 63.209  | 0.000   |
| I69                | 3.880 | 0.060 | 64.465  | 0.000   |
| I70                | 3.541 | 0.056 | 63.720  | 0.000   |
| I71                | 3.346 | 0.053 | 63.202  | 0.000   |
| I72                | 3.607 | 0.056 | 63.881  | 0.000   |
| I73                | 3.901 | 0.060 | 64.508  | 0.000   |
| I74                | 3.781 | 0.059 | 64.266  | 0.000   |
| I75                | 3.746 | 0.058 | 64.192  | 0.000   |
| I76                | 3.361 | 0.053 | 63.243  | 0.000   |
| I77                | 3.776 | 0.059 | 64.255  | 0.000   |
| I78                | 3.071 | 0.049 | 62.323  | 0.000   |
| I79                | 2.553 | 0.043 | 60.020  | 0.000   |
| I80                | 2.981 | 0.048 | 61.992  | 0.000   |
| I81                | 3.617 | 0.057 | 63.903  | 0.000   |
| I82                | 3.274 | 0.052 | 62.991  | 0.000   |
| I83                | 3.299 | 0.052 | 63.063  | 0.000   |
| Variances          |       |       |         |         |
| F1                 | 1.000 | 0.000 | 999.000 | 999.000 |
| F2                 | 1.000 | 0.000 | 999.000 | 999.000 |
| F3                 | 1.000 | 0.000 | 999.000 | 999.000 |
| Residual Variances |       |       |         |         |
| I1                 | 0.468 | 0.015 | 32.172  | 0.000   |
| I2                 | 0.436 | 0.014 | 31.174  | 0.000   |
| I3                 | 0.405 | 0.013 | 30.255  | 0.000   |
| I4                 | 0.733 | 0.016 | 46.003  | 0.000   |
| I5                 | 0.543 | 0.016 | 34.903  | 0.000   |
| I6                 | 0.471 | 0.015 | 32.276  | 0.000   |
| I7                 | 0.307 | 0.011 | 27.625  | 0.000   |
| I8                 | 0.369 | 0.013 | 29.204  | 0.000   |
| I9                 | 0.326 | 0.012 | 28.112  | 0.000   |
| I10                | 0.312 | 0.011 | 27.812  | 0.000   |
| I11                | 0.295 | 0.011 | 27.355  | 0.000   |
| I12                | 0.333 | 0.012 | 28.302  | 0.000   |
| I13                | 0.672 | 0.016 | 41.473  | 0.000   |
| I14                | 0.357 | 0.012 | 29.010  | 0.000   |
| I15                | 0.689 | 0.016 | 42.578  | 0.000   |

---

---

|     |       |       |        |       |
|-----|-------|-------|--------|-------|
| I16 | 0.460 | 0.014 | 31.973 | 0.000 |
| I17 | 0.428 | 0.014 | 30.817 | 0.000 |
| I18 | 0.452 | 0.014 | 31.547 | 0.000 |
| I19 | 0.393 | 0.013 | 29.858 | 0.000 |
| I20 | 0.473 | 0.015 | 32.223 | 0.000 |
| I21 | 0.501 | 0.015 | 33.167 | 0.000 |
| I22 | 0.468 | 0.015 | 32.052 | 0.000 |
| I23 | 0.476 | 0.015 | 32.373 | 0.000 |
| I24 | 0.564 | 0.016 | 35.697 | 0.000 |
| I25 | 0.493 | 0.015 | 32.999 | 0.000 |
| I26 | 0.464 | 0.014 | 32.399 | 0.000 |
| I27 | 0.525 | 0.015 | 34.524 | 0.000 |
| I28 | 0.703 | 0.016 | 43.875 | 0.000 |
| I29 | 0.360 | 0.012 | 29.432 | 0.000 |
| I30 | 0.341 | 0.012 | 28.938 | 0.000 |
| I31 | 0.393 | 0.013 | 30.286 | 0.000 |
| I32 | 0.335 | 0.012 | 28.693 | 0.000 |
| I33 | 0.325 | 0.011 | 28.449 | 0.000 |
| I34 | 0.321 | 0.011 | 28.444 | 0.000 |
| I35 | 0.337 | 0.012 | 28.795 | 0.000 |
| I36 | 0.269 | 0.010 | 27.249 | 0.000 |
| I37 | 0.299 | 0.011 | 27.940 | 0.000 |
| I38 | 0.247 | 0.009 | 26.747 | 0.000 |
| I39 | 0.301 | 0.011 | 28.015 | 0.000 |
| I40 | 0.349 | 0.012 | 29.187 | 0.000 |
| I41 | 0.320 | 0.011 | 28.491 | 0.000 |
| I42 | 0.676 | 0.016 | 42.039 | 0.000 |
| I43 | 0.696 | 0.016 | 43.402 | 0.000 |
| I44 | 0.362 | 0.012 | 29.510 | 0.000 |
| I45 | 0.275 | 0.010 | 27.419 | 0.000 |
| I46 | 0.462 | 0.014 | 32.331 | 0.000 |
| I47 | 0.612 | 0.016 | 38.338 | 0.000 |
| I48 | 0.322 | 0.011 | 28.471 | 0.000 |
| I49 | 0.323 | 0.011 | 28.475 | 0.000 |
| I50 | 0.394 | 0.013 | 30.323 | 0.000 |
| I51 | 0.332 | 0.012 | 28.680 | 0.000 |
| I52 | 0.351 | 0.012 | 29.169 | 0.000 |
| I53 | 0.394 | 0.013 | 30.327 | 0.000 |
| I54 | 0.426 | 0.014 | 30.950 | 0.000 |
| I55 | 0.536 | 0.015 | 34.648 | 0.000 |
| I56 | 0.731 | 0.016 | 45.871 | 0.000 |
| I57 | 0.652 | 0.016 | 40.220 | 0.000 |
| I58 | 0.447 | 0.014 | 31.547 | 0.000 |
| I59 | 0.736 | 0.016 | 46.341 | 0.000 |
| I60 | 0.723 | 0.016 | 45.171 | 0.000 |
| I61 | 0.757 | 0.016 | 48.299 | 0.000 |
| I62 | 0.444 | 0.014 | 31.477 | 0.000 |
| I63 | 0.685 | 0.016 | 42.291 | 0.000 |
| I64 | 0.336 | 0.012 | 28.438 | 0.000 |
| I65 | 0.614 | 0.016 | 38.164 | 0.000 |
| I66 | 0.397 | 0.013 | 30.081 | 0.000 |
| I67 | 0.358 | 0.012 | 29.031 | 0.000 |
| I68 | 0.393 | 0.013 | 30.014 | 0.000 |
| I69 | 0.323 | 0.011 | 28.155 | 0.000 |
| I70 | 0.436 | 0.014 | 31.251 | 0.000 |
| I71 | 0.466 | 0.014 | 32.204 | 0.000 |
| I72 | 0.367 | 0.013 | 29.284 | 0.000 |
| I73 | 0.295 | 0.011 | 27.414 | 0.000 |
| I74 | 0.314 | 0.011 | 27.919 | 0.000 |
| I75 | 0.362 | 0.012 | 29.160 | 0.000 |
| I76 | 0.468 | 0.015 | 32.245 | 0.000 |
| I77 | 0.344 | 0.012 | 28.715 | 0.000 |
| I78 | 0.599 | 0.016 | 37.389 | 0.000 |

---

|     |       |       |        |       |
|-----|-------|-------|--------|-------|
| I79 | 0.740 | 0.016 | 46.599 | 0.000 |
| I80 | 0.574 | 0.016 | 36.227 | 0.000 |
| I81 | 0.430 | 0.014 | 31.083 | 0.000 |
| I82 | 0.519 | 0.015 | 34.031 | 0.000 |
| I83 | 0.543 | 0.016 | 34.961 | 0.000 |

## STD Standardization

|     |    | Estimate | S. E. | Est./S. E. | Two-Tailed<br>P-Value |
|-----|----|----------|-------|------------|-----------------------|
| F1  | BY |          |       |            |                       |
| I1  |    | 1.463    | 0.036 | 40.881     | 0.000                 |
| I2  |    | 1.496    | 0.035 | 42.604     | 0.000                 |
| I3  |    | 1.519    | 0.034 | 44.217     | 0.000                 |
| I4  |    | 1.643    | 0.062 | 26.579     | 0.000                 |
| I5  |    | 1.660    | 0.045 | 36.908     | 0.000                 |
| I6  |    | 1.597    | 0.039 | 40.746     | 0.000                 |
| I7  |    | 1.542    | 0.031 | 49.565     | 0.000                 |
| I8  |    | 1.468    | 0.032 | 46.154     | 0.000                 |
| I9  |    | 1.547    | 0.032 | 48.503     | 0.000                 |
| I10 |    | 1.499    | 0.030 | 49.284     | 0.000                 |
| I11 |    | 1.537    | 0.031 | 50.208     | 0.000                 |
| I12 |    | 1.491    | 0.031 | 48.135     | 0.000                 |
| I13 |    | 1.546    | 0.051 | 30.019     | 0.000                 |
| I14 |    | 1.547    | 0.033 | 46.842     | 0.000                 |
| I15 |    | 1.543    | 0.053 | 29.106     | 0.000                 |
| I16 |    | 1.478    | 0.036 | 41.305     | 0.000                 |
| I17 |    | 1.567    | 0.036 | 42.990     | 0.000                 |
| I18 |    | 1.560    | 0.037 | 41.676     | 0.000                 |
| I19 |    | 1.548    | 0.035 | 44.845     | 0.000                 |
| I20 |    | 1.517    | 0.037 | 40.579     | 0.000                 |
| I21 |    | 1.491    | 0.038 | 39.093     | 0.000                 |
| I22 |    | 1.469    | 0.036 | 40.824     | 0.000                 |
| I23 |    | 1.476    | 0.036 | 40.462     | 0.000                 |
| I24 |    | 1.487    | 0.042 | 35.823     | 0.000                 |
| I25 |    | 1.375    | 0.035 | 39.538     | 0.000                 |
| F2  | BY |          |       |            |                       |
| I26 |    | 1.445    | 0.035 | 41.267     | 0.000                 |
| I27 |    | 1.389    | 0.037 | 38.007     | 0.000                 |
| I28 |    | 1.438    | 0.051 | 28.422     | 0.000                 |
| I29 |    | 1.462    | 0.031 | 46.774     | 0.000                 |
| I30 |    | 1.499    | 0.031 | 47.855     | 0.000                 |
| I31 |    | 1.460    | 0.032 | 45.024     | 0.000                 |
| I32 |    | 1.567    | 0.033 | 48.143     | 0.000                 |
| I33 |    | 1.564    | 0.032 | 48.647     | 0.000                 |
| I34 |    | 1.543    | 0.032 | 48.906     | 0.000                 |
| I35 |    | 1.587    | 0.033 | 48.030     | 0.000                 |
| I36 |    | 1.591    | 0.031 | 51.845     | 0.000                 |
| I37 |    | 1.644    | 0.033 | 50.153     | 0.000                 |
| I38 |    | 1.603    | 0.030 | 53.055     | 0.000                 |
| I39 |    | 1.565    | 0.031 | 50.017     | 0.000                 |
| I40 |    | 1.400    | 0.030 | 47.414     | 0.000                 |
| I41 |    | 1.519    | 0.031 | 48.994     | 0.000                 |
| I42 |    | 1.489    | 0.050 | 29.903     | 0.000                 |
| I43 |    | 1.559    | 0.054 | 28.805     | 0.000                 |
| I44 |    | 1.457    | 0.031 | 46.674     | 0.000                 |
| I45 |    | 1.534    | 0.030 | 51.475     | 0.000                 |
| I46 |    | 1.418    | 0.034 | 41.361     | 0.000                 |
| I47 |    | 1.555    | 0.047 | 33.384     | 0.000                 |
| I48 |    | 1.497    | 0.031 | 48.853     | 0.000                 |



---

|            |      |       |       |         |       |
|------------|------|-------|-------|---------|-------|
| I49        |      | 1.504 | 0.031 | 48.799  | 0.000 |
| I50        |      | 1.537 | 0.034 | 44.965  | 0.000 |
| I51        |      | 1.479 | 0.031 | 48.314  | 0.000 |
| I52        |      | 1.445 | 0.031 | 47.296  | 0.000 |
| I53        |      | 1.463 | 0.033 | 44.944  | 0.000 |
| F3         | BY   |       |       |         |       |
| I54        |      | 1.461 | 0.034 | 43.125  | 0.000 |
| I55        |      | 1.327 | 0.036 | 37.334  | 0.000 |
| I56        |      | 1.360 | 0.051 | 26.715  | 0.000 |
| I57        |      | 1.183 | 0.038 | 31.133  | 0.000 |
| I58        |      | 1.321 | 0.031 | 42.041  | 0.000 |
| I59        |      | 1.359 | 0.051 | 26.412  | 0.000 |
| I60        |      | 1.349 | 0.050 | 27.196  | 0.000 |
| I61        |      | 1.310 | 0.052 | 25.234  | 0.000 |
| I62        |      | 1.335 | 0.032 | 42.197  | 0.000 |
| I63        |      | 1.469 | 0.050 | 29.343  | 0.000 |
| I64        |      | 1.421 | 0.030 | 47.990  | 0.000 |
| I65        |      | 1.284 | 0.039 | 33.179  | 0.000 |
| I66        |      | 1.396 | 0.031 | 44.692  | 0.000 |
| I67        |      | 1.390 | 0.030 | 46.798  | 0.000 |
| I68        |      | 1.469 | 0.033 | 44.937  | 0.000 |
| I69        |      | 1.431 | 0.029 | 48.736  | 0.000 |
| I70        |      | 1.337 | 0.031 | 42.639  | 0.000 |
| I71        |      | 1.429 | 0.035 | 41.009  | 0.000 |
| I72        |      | 1.411 | 0.030 | 46.317  | 0.000 |
| I73        |      | 1.428 | 0.028 | 50.280  | 0.000 |
| I74        |      | 1.430 | 0.029 | 49.190  | 0.000 |
| I75        |      | 1.425 | 0.031 | 46.556  | 0.000 |
| I76        |      | 1.356 | 0.033 | 40.918  | 0.000 |
| I77        |      | 1.421 | 0.030 | 47.562  | 0.000 |
| I78        |      | 1.248 | 0.037 | 33.991  | 0.000 |
| I79        |      | 1.129 | 0.043 | 26.210  | 0.000 |
| I80        |      | 1.328 | 0.038 | 35.334  | 0.000 |
| I81        |      | 1.404 | 0.033 | 42.944  | 0.000 |
| I82        |      | 1.339 | 0.035 | 38.219  | 0.000 |
| I83        |      | 1.297 | 0.035 | 36.939  | 0.000 |
| F2         | WITH |       |       |         |       |
| F1         |      | 0.816 | 0.007 | 109.649 | 0.000 |
| F3         | WITH |       |       |         |       |
| F1         |      | 0.722 | 0.011 | 68.736  | 0.000 |
| F2         |      | 0.810 | 0.008 | 106.346 | 0.000 |
| Intercepts |      |       |       |         |       |
| I1         |      | 6.431 | 0.041 | 155.524 | 0.000 |
| I2         |      | 6.071 | 0.041 | 147.943 | 0.000 |
| I3         |      | 6.482 | 0.041 | 159.652 | 0.000 |
| I4         |      | 6.389 | 0.066 | 97.444  | 0.000 |
| I5         |      | 6.193 | 0.051 | 122.288 | 0.000 |
| I6         |      | 6.230 | 0.045 | 137.679 | 0.000 |
| I7         |      | 6.299 | 0.038 | 164.978 | 0.000 |
| I8         |      | 6.669 | 0.038 | 175.128 | 0.000 |
| I9         |      | 6.284 | 0.039 | 161.756 | 0.000 |
| I10        |      | 6.316 | 0.037 | 169.537 | 0.000 |
| I11        |      | 6.439 | 0.038 | 170.641 | 0.000 |
| I12        |      | 6.705 | 0.038 | 178.253 | 0.000 |
| I13        |      | 6.458 | 0.056 | 116.055 | 0.000 |
| I14        |      | 5.960 | 0.040 | 149.899 | 0.000 |
| I15        |      | 5.951 | 0.057 | 104.356 | 0.000 |
| I16        |      | 6.377 | 0.041 | 153.785 | 0.000 |
| I17        |      | 6.032 | 0.043 | 141.281 | 0.000 |

---

---

|     |       |       |         |       |
|-----|-------|-------|---------|-------|
| I18 | 5.972 | 0.043 | 137.479 | 0.000 |
| I19 | 6.112 | 0.041 | 149.257 | 0.000 |
| I20 | 5.693 | 0.043 | 132.217 | 0.000 |
| I21 | 5.658 | 0.044 | 130.007 | 0.000 |
| I22 | 5.753 | 0.042 | 138.558 | 0.000 |
| I23 | 6.054 | 0.042 | 144.136 | 0.000 |
| I24 | 5.463 | 0.046 | 117.724 | 0.000 |
| I25 | 6.144 | 0.040 | 154.367 | 0.000 |
| I26 | 6.085 | 0.041 | 149.687 | 0.000 |
| I27 | 6.212 | 0.042 | 149.507 | 0.000 |
| I28 | 6.546 | 0.054 | 120.429 | 0.000 |
| I29 | 6.285 | 0.038 | 166.855 | 0.000 |
| I30 | 6.236 | 0.038 | 163.869 | 0.000 |
| I31 | 6.635 | 0.039 | 171.860 | 0.000 |
| I32 | 6.358 | 0.040 | 160.592 | 0.000 |
| I33 | 6.391 | 0.039 | 162.873 | 0.000 |
| I34 | 6.346 | 0.039 | 164.417 | 0.000 |
| I35 | 6.259 | 0.040 | 155.761 | 0.000 |
| I36 | 6.054 | 0.038 | 157.874 | 0.000 |
| I37 | 5.881 | 0.040 | 145.343 | 0.000 |
| I38 | 6.189 | 0.038 | 162.492 | 0.000 |
| I39 | 6.042 | 0.039 | 156.599 | 0.000 |
| I40 | 6.490 | 0.036 | 181.466 | 0.000 |
| I41 | 6.196 | 0.038 | 163.180 | 0.000 |
| I42 | 6.291 | 0.054 | 116.567 | 0.000 |
| I43 | 6.167 | 0.058 | 105.743 | 0.000 |
| I44 | 6.048 | 0.038 | 160.838 | 0.000 |
| I45 | 6.071 | 0.037 | 163.511 | 0.000 |
| I46 | 5.629 | 0.040 | 141.298 | 0.000 |
| I47 | 6.095 | 0.051 | 118.378 | 0.000 |
| I48 | 6.030 | 0.037 | 160.861 | 0.000 |
| I49 | 6.098 | 0.038 | 161.869 | 0.000 |
| I50 | 5.734 | 0.041 | 140.897 | 0.000 |
| I51 | 6.161 | 0.037 | 165.149 | 0.000 |
| I52 | 6.291 | 0.037 | 170.159 | 0.000 |
| I53 | 6.055 | 0.039 | 156.262 | 0.000 |
| I54 | 6.514 | 0.040 | 163.901 | 0.000 |
| I55 | 6.144 | 0.040 | 153.078 | 0.000 |
| I56 | 6.598 | 0.054 | 122.077 | 0.000 |
| I57 | 5.974 | 0.041 | 144.501 | 0.000 |
| I58 | 6.267 | 0.037 | 171.166 | 0.000 |
| I59 | 6.192 | 0.055 | 113.537 | 0.000 |
| I60 | 6.853 | 0.053 | 129.811 | 0.000 |
| I61 | 6.434 | 0.055 | 117.576 | 0.000 |
| I62 | 6.214 | 0.037 | 168.371 | 0.000 |
| I63 | 6.672 | 0.054 | 123.777 | 0.000 |
| I64 | 6.717 | 0.036 | 186.846 | 0.000 |
| I65 | 5.883 | 0.043 | 138.083 | 0.000 |
| I66 | 6.466 | 0.037 | 174.474 | 0.000 |
| I67 | 6.636 | 0.036 | 185.662 | 0.000 |
| I68 | 6.314 | 0.039 | 162.461 | 0.000 |
| I69 | 6.747 | 0.036 | 188.232 | 0.000 |
| I70 | 6.302 | 0.037 | 171.795 | 0.000 |
| I71 | 6.545 | 0.040 | 162.341 | 0.000 |
| I72 | 6.395 | 0.037 | 175.007 | 0.000 |
| I73 | 6.632 | 0.035 | 189.288 | 0.000 |
| I74 | 6.530 | 0.036 | 183.425 | 0.000 |
| I75 | 6.686 | 0.037 | 181.726 | 0.000 |
| I76 | 6.246 | 0.038 | 163.053 | 0.000 |
| I77 | 6.626 | 0.036 | 183.187 | 0.000 |
| I78 | 6.052 | 0.041 | 148.985 | 0.000 |
| I79 | 5.646 | 0.046 | 123.852 | 0.000 |
| I80 | 6.062 | 0.042 | 144.630 | 0.000 |

---

|                    |       |       |         |         |
|--------------------|-------|-------|---------|---------|
| I81                | 6.726 | 0.038 | 175.471 | 0.000   |
| I82                | 6.321 | 0.040 | 158.863 | 0.000   |
| I83                | 6.330 | 0.040 | 160.038 | 0.000   |
| Variances          |       |       |         |         |
| F1                 | 1.000 | 0.000 | 999.000 | 999.000 |
| F2                 | 1.000 | 0.000 | 999.000 | 999.000 |
| F3                 | 1.000 | 0.000 | 999.000 | 999.000 |
| Residual Variances |       |       |         |         |
| I1                 | 1.884 | 0.057 | 33.114  | 0.000   |
| I2                 | 1.727 | 0.052 | 32.972  | 0.000   |
| I3                 | 1.573 | 0.048 | 32.764  | 0.000   |
| I4                 | 7.419 | 0.219 | 33.929  | 0.000   |
| I5                 | 3.281 | 0.098 | 33.431  | 0.000   |
| I6                 | 2.269 | 0.068 | 33.144  | 0.000   |
| I7                 | 1.053 | 0.033 | 31.906  | 0.000   |
| I8                 | 1.260 | 0.039 | 32.446  | 0.000   |
| I9                 | 1.159 | 0.036 | 32.109  | 0.000   |
| I10                | 1.020 | 0.032 | 32.045  | 0.000   |
| I11                | 0.990 | 0.031 | 31.801  | 0.000   |
| I12                | 1.109 | 0.034 | 32.198  | 0.000   |
| I13                | 4.901 | 0.145 | 33.823  | 0.000   |
| I14                | 1.329 | 0.041 | 32.523  | 0.000   |
| I15                | 5.272 | 0.156 | 33.857  | 0.000   |
| I16                | 1.864 | 0.056 | 33.131  | 0.000   |
| I17                | 1.835 | 0.056 | 32.790  | 0.000   |
| I18                | 2.009 | 0.061 | 32.904  | 0.000   |
| I19                | 1.552 | 0.048 | 32.612  | 0.000   |
| I20                | 2.065 | 0.063 | 33.020  | 0.000   |
| I21                | 2.233 | 0.067 | 33.136  | 0.000   |
| I22                | 1.900 | 0.058 | 32.979  | 0.000   |
| I23                | 1.976 | 0.060 | 33.098  | 0.000   |
| I24                | 2.857 | 0.085 | 33.465  | 0.000   |
| I25                | 1.840 | 0.055 | 33.204  | 0.000   |
| I26                | 1.803 | 0.054 | 33.505  | 0.000   |
| I27                | 2.135 | 0.063 | 33.674  | 0.000   |
| I28                | 4.889 | 0.144 | 34.016  | 0.000   |
| I29                | 1.203 | 0.036 | 33.021  | 0.000   |
| I30                | 1.161 | 0.035 | 32.913  | 0.000   |
| I31                | 1.378 | 0.042 | 33.186  | 0.000   |
| I32                | 1.235 | 0.038 | 32.725  | 0.000   |
| I33                | 1.180 | 0.036 | 32.634  | 0.000   |
| I34                | 1.127 | 0.034 | 32.751  | 0.000   |
| I35                | 1.281 | 0.039 | 32.807  | 0.000   |
| I36                | 0.930 | 0.029 | 32.379  | 0.000   |
| I37                | 1.152 | 0.035 | 32.630  | 0.000   |
| I38                | 0.845 | 0.026 | 32.132  | 0.000   |
| I39                | 1.056 | 0.032 | 32.674  | 0.000   |
| I40                | 1.050 | 0.032 | 33.022  | 0.000   |
| I41                | 1.086 | 0.033 | 32.859  | 0.000   |
| I42                | 4.639 | 0.136 | 33.987  | 0.000   |
| I43                | 5.573 | 0.164 | 34.016  | 0.000   |
| I44                | 1.206 | 0.036 | 33.070  | 0.000   |
| I45                | 0.894 | 0.028 | 32.471  | 0.000   |
| I46                | 1.725 | 0.052 | 33.490  | 0.000   |
| I47                | 3.822 | 0.113 | 33.876  | 0.000   |
| I48                | 1.066 | 0.033 | 32.763  | 0.000   |
| I49                | 1.079 | 0.033 | 32.742  | 0.000   |
| I50                | 1.536 | 0.046 | 33.199  | 0.000   |
| I51                | 1.087 | 0.033 | 32.789  | 0.000   |
| I52                | 1.128 | 0.034 | 32.942  | 0.000   |
| I53                | 1.394 | 0.042 | 33.193  | 0.000   |

---

---

|     |       |       |        |       |
|-----|-------|-------|--------|-------|
| I54 | 1.586 | 0.048 | 32.990 | 0.000 |
| I55 | 2.032 | 0.061 | 33.449 | 0.000 |
| I56 | 5.027 | 0.148 | 33.944 | 0.000 |
| I57 | 2.623 | 0.078 | 33.779 | 0.000 |
| I58 | 1.410 | 0.043 | 33.075 | 0.000 |
| I59 | 5.156 | 0.152 | 33.956 | 0.000 |
| I60 | 4.741 | 0.140 | 33.931 | 0.000 |
| I61 | 5.334 | 0.157 | 34.004 | 0.000 |
| I62 | 1.423 | 0.043 | 33.081 | 0.000 |
| I63 | 4.682 | 0.138 | 33.851 | 0.000 |
| I64 | 1.022 | 0.032 | 32.314 | 0.000 |
| I65 | 2.624 | 0.078 | 33.698 | 0.000 |
| I66 | 1.283 | 0.039 | 32.792 | 0.000 |
| I67 | 1.076 | 0.033 | 32.529 | 0.000 |
| I68 | 1.396 | 0.043 | 32.833 | 0.000 |
| I69 | 0.976 | 0.030 | 32.272 | 0.000 |
| I70 | 1.380 | 0.042 | 33.067 | 0.000 |
| I71 | 1.784 | 0.054 | 33.203 | 0.000 |
| I72 | 1.153 | 0.035 | 32.618 | 0.000 |
| I73 | 0.851 | 0.027 | 31.918 | 0.000 |
| I74 | 0.938 | 0.029 | 32.152 | 0.000 |
| I75 | 1.155 | 0.035 | 32.576 | 0.000 |
| I76 | 1.616 | 0.049 | 33.197 | 0.000 |
| I77 | 1.060 | 0.033 | 32.480 | 0.000 |
| I78 | 2.327 | 0.069 | 33.646 | 0.000 |
| I79 | 3.618 | 0.107 | 33.948 | 0.000 |
| I80 | 2.372 | 0.071 | 33.574 | 0.000 |
| I81 | 1.487 | 0.045 | 33.041 | 0.000 |
| I82 | 1.935 | 0.058 | 33.407 | 0.000 |
| I83 | 2.001 | 0.060 | 33.485 | 0.000 |

## R-SQUARE

| Observed<br>Variable | Estimate | S. E. | Est. /S. E. | Two-Tailed<br>P-Value |
|----------------------|----------|-------|-------------|-----------------------|
| I1                   | 0.532    | 0.015 | 36.555      | 0.000                 |
| I2                   | 0.564    | 0.014 | 40.367      | 0.000                 |
| I3                   | 0.595    | 0.013 | 44.390      | 0.000                 |
| I4                   | 0.381    | 0.016 | 16.744      | 0.000                 |
| I5                   | 0.457    | 0.016 | 29.320      | 0.000                 |
| I6                   | 0.529    | 0.015 | 36.281      | 0.000                 |
| I7                   | 0.693    | 0.011 | 62.375      | 0.000                 |
| I8                   | 0.631    | 0.013 | 49.935      | 0.000                 |
| I9                   | 0.674    | 0.012 | 58.080      | 0.000                 |
| I10                  | 0.688    | 0.011 | 61.249      | 0.000                 |
| I11                  | 0.705    | 0.011 | 65.222      | 0.000                 |
| I12                  | 0.667    | 0.012 | 56.703      | 0.000                 |
| I13                  | 0.452    | 0.016 | 20.216      | 0.000                 |
| I14                  | 0.643    | 0.012 | 52.229      | 0.000                 |
| I15                  | 0.433    | 0.016 | 19.239      | 0.000                 |
| I16                  | 0.540    | 0.014 | 37.464      | 0.000                 |
| I17                  | 0.572    | 0.014 | 41.240      | 0.000                 |
| I18                  | 0.548    | 0.014 | 38.212      | 0.000                 |
| I19                  | 0.607    | 0.013 | 46.071      | 0.000                 |
| I20                  | 0.527    | 0.015 | 35.903      | 0.000                 |
| I21                  | 0.499    | 0.015 | 33.033      | 0.000                 |
| I22                  | 0.532    | 0.015 | 36.399      | 0.000                 |
| I23                  | 0.524    | 0.015 | 35.685      | 0.000                 |
| I24                  | 0.436    | 0.016 | 27.633      | 0.000                 |
| I25                  | 0.507    | 0.015 | 33.887      | 0.000                 |
| I26                  | 0.536    | 0.014 | 37.490      | 0.000                 |

---

---

|     |       |       |        |       |
|-----|-------|-------|--------|-------|
| I27 | 0.475 | 0.015 | 31.205 | 0.000 |
| I28 | 0.416 | 0.016 | 18.545 | 0.000 |
| I29 | 0.640 | 0.012 | 52.245 | 0.000 |
| I30 | 0.659 | 0.012 | 56.042 | 0.000 |
| I31 | 0.607 | 0.013 | 46.823 | 0.000 |
| I32 | 0.665 | 0.012 | 57.033 | 0.000 |
| I33 | 0.675 | 0.011 | 58.965 | 0.000 |
| I34 | 0.679 | 0.011 | 60.096 | 0.000 |
| I35 | 0.663 | 0.012 | 56.647 | 0.000 |
| I36 | 0.731 | 0.010 | 74.148 | 0.000 |
| I37 | 0.701 | 0.011 | 65.545 | 0.000 |
| I38 | 0.753 | 0.009 | 81.370 | 0.000 |
| I39 | 0.699 | 0.011 | 64.933 | 0.000 |
| I40 | 0.651 | 0.012 | 54.480 | 0.000 |
| I41 | 0.680 | 0.011 | 60.532 | 0.000 |
| I42 | 0.448 | 0.016 | 20.104 | 0.000 |
| I43 | 0.424 | 0.016 | 18.939 | 0.000 |
| I44 | 0.638 | 0.012 | 51.931 | 0.000 |
| I45 | 0.725 | 0.010 | 72.153 | 0.000 |
| I46 | 0.538 | 0.014 | 37.690 | 0.000 |
| I47 | 0.388 | 0.016 | 24.262 | 0.000 |
| I48 | 0.678 | 0.011 | 59.885 | 0.000 |
| I49 | 0.677 | 0.011 | 59.648 | 0.000 |
| I50 | 0.606 | 0.013 | 46.657 | 0.000 |
| I51 | 0.668 | 0.012 | 57.731 | 0.000 |
| I52 | 0.649 | 0.012 | 54.018 | 0.000 |
| I53 | 0.606 | 0.013 | 46.593 | 0.000 |
| I54 | 0.574 | 0.014 | 41.641 | 0.000 |
| I55 | 0.464 | 0.015 | 30.018 | 0.000 |
| I56 | 0.383 | 0.016 | 16.873 | 0.000 |
| I57 | 0.348 | 0.016 | 21.470 | 0.000 |
| I58 | 0.553 | 0.014 | 39.086 | 0.000 |
| I59 | 0.376 | 0.016 | 16.591 | 0.000 |
| I60 | 0.393 | 0.016 | 17.328 | 0.000 |
| I61 | 0.480 | 0.016 | 15.530 | 0.000 |
| I62 | 0.556 | 0.014 | 39.447 | 0.000 |
| I63 | 0.438 | 0.016 | 19.489 | 0.000 |
| I64 | 0.664 | 0.012 | 56.219 | 0.000 |
| I65 | 0.386 | 0.016 | 23.971 | 0.000 |
| I66 | 0.603 | 0.013 | 45.709 | 0.000 |
| I67 | 0.642 | 0.012 | 52.084 | 0.000 |
| I68 | 0.607 | 0.013 | 46.423 | 0.000 |
| I69 | 0.677 | 0.011 | 59.110 | 0.000 |
| I70 | 0.564 | 0.014 | 40.483 | 0.000 |
| I71 | 0.534 | 0.014 | 36.851 | 0.000 |
| I72 | 0.633 | 0.013 | 50.536 | 0.000 |
| I73 | 0.705 | 0.011 | 65.649 | 0.000 |
| I74 | 0.686 | 0.011 | 60.918 | 0.000 |
| I75 | 0.638 | 0.012 | 51.296 | 0.000 |
| I76 | 0.532 | 0.015 | 36.655 | 0.000 |
| I77 | 0.656 | 0.012 | 54.728 | 0.000 |
| I78 | 0.401 | 0.016 | 25.042 | 0.000 |
| I79 | 0.372 | 0.016 | 16.404 | 0.000 |
| I80 | 0.426 | 0.016 | 26.924 | 0.000 |
| I81 | 0.570 | 0.014 | 41.213 | 0.000 |
| I82 | 0.481 | 0.015 | 31.519 | 0.000 |
| I83 | 0.457 | 0.016 | 29.379 | 0.000 |

## QUALITY OF NUMERICAL RESULTS

Condition Number for the Information Matrix  
(ratio of smallest to largest eigenvalue)

0.109E-02

DIAGRAM INFORMATION

Use View Diagram under the Diagram menu in the Mplus Editor to view the diagram.  
If running Mplus from the Mplus Diagrammer, the diagram opens automatically.

Diagram output

c:\users\hz\desktop\mplus\3fcfa.dgm

Beginning Time: 10:04:36  
Ending Time: 10:04:42  
Elapsed Time: 00:00:06

MUTHEN & MUTHEN

3463 Stoner Ave.  
Los Angeles, CA 90066

Tel: (310) 391-9971  
Fax: (310) 391-8971  
Web: [www.StatModel.com](http://www.StatModel.com)  
Support: [Support@StatModel.com](mailto:Support@StatModel.com)

Copyright (c) 1998-2012 Muthen & Muthen
